# Supplementary material
Source: publisher site journal article supplement (https://www.dovepress.com/article/supplementary_file/608721/608721%20Revised%20Supplementary%20Tables%20S1-S5.docx)
Supplement: Supplementary file 1 [file 608721%20Revised%20Supplementary%20Tables%20S1-S5.docx]

**Supplementary Table S1. Dosing Information for Intravenous Colistin (Colistimethate Sodium)**

| Loading dose (LD) | 300 mg CBA (~9 million IU) infused over 0.5–1 hour | |
| --- | --- | --- |
| Creatinine Clearance (CrCl, mL/min) | Maintenance Dose (mg CBA) | Maintenance Dose (Million IU) |
| ≥70 | 180 mg every 12 hours | 5.5 IU every 12 hours |
| 50 to <70 | 150 mg every 12 hours | 4.5 IU every 12 hours |
| 30 to <50 | 110 mg every 12 hours | 3.3 IU every 12 hours |
| 10 to <30 | 80 mg every 12 hours | 2.4 IU every 12 hours |
| <10 | 70 mg every 12 hours | 2.1 IU every 12 hours |
| Intermittent Hemodialysis (HD) | 130 mg/day with 40–50 mg supplemental dose after HD on HD days | 3.9 IU daily with 1.2–1.5 IU supplemental dose after HD on HD days |
| Continuous Renal Replacement Therapy (CRRT) | 220 mg every 12 hours | 6.6 IU every 12 hours |
| Peritoneal Dialysis (PD) | 150 mg every 24 hours | 4.5 IU every 24 hours |

**The following table reflects the institutional dosing guidelines for intravenous colistin (colistimethate sodium) used at the Ministry of National Guard Health Affairs (MNGHA), Saudi Arabia.**

Maintenance dose (MD): Maximum 360 mg/day. Should be administered 12 hours after the loading dose. Daily doses are divided into two doses given 12 hours apart, except in patients on dialysis.

*Abbreviations:* CBA = colistin base activity; IU = international units; HD = hemodialysis; CRRT = continuous renal replacement therapy; PD = peritoneal dialysis.
*Source:* Ministry of National Guard Health Affairs (MNGHA) Institutional Dosing Guidelines, 2021.

**Supplementary Table S2. Detailed laboratory parameters, nephrotoxic exposures, and clinical outcomes among patients treated with colistin for urinary tract infections.**

| Characteristic | All patients  (N = 102) |
| --- | --- |
| Laboratory parameters at diagnosis | |
| ─ Serum creatinine, µmol/L, median (IQR) | 121 (58–195.5) |
| ─ Lactic acid, mmol/L, median (IQR) | 1.57 (1.24–2.12) |
| ─ C-reactive protein, mg/L, median (IQR) | 97 (61–130) |
| ─ Procalcitonin, ng/mL, median (IQR) | 0.34 (0.12–16.29) |
| Temperature at diagnosis, °C, median (IQR) | 37.0 (36.7–38.0) |
| Antibacterial therapy prior to colistin initiation | |
| Any prior systemic antibacterial agent, n (%) | 53 (52.0) |
| ─ Carbapenem | 36 (35.3) |
| ─ Piperacillin–tazobactam | 13 (12.7) |
| ─ Cephalosporin | 4 (3.9) |
| ─ Aminoglycoside | 5 (4.9) |
| ─ Ciprofloxacin | 4 (3.9) |
| ─ No prior antibacterial therapy | 49 (48.0) |
| Infection characteristics (additional) | |
| ─ Presence of urinary catheter, n (%) | 51 (50.0) |
| ─ Pneumonia (concurrent infection), n (%) | 11 (10.8) |
| ─ Intra-abdominal infection (concurrent), n (%) | 5 (4.9) |
| Discharge disposition |  |
| ─ Discharged home, n (%) | 80 (78.4) |
| ─ Discharged to long-term care facility, n (%) | 3 (2.9) |
| ─ Transferred to outside hospital, n (%) | 2 (2.0) |

**Footnotes:**

Abbreviations: AKI = acute kidney injury; IQR = interquartile range; SD = standard deviation.
Laboratory values are reported as both median (IQR) and mean ± SD to allow comparison with prior literature using different reporting conventions.

**Supplementary Table S3. Multivariable analysis of factors associated with colistin-induced AKI**

| Characteristic | Adjusted OR | 95% CI | *p*-value |
| --- | --- | --- | --- |
| Age (per 1-year increase) | 1.04 | 0.99–1.12 | 0.207 |
| Baseline serum creatinine (per µmol/L increase) | 1.00 | 0.99–1.01 | 0.835 |
| ICU admission | 3.60 | 0.93–13.37 | 0.054 |
| Colistin daily dose (per mg/kg/day increase) | 0.89 | 0.54–1.35 | 0.600 |

**Footnotes:**
Abbreviations: AKI = acute kidney injury; ICU = intensive care unit; OR = odds ratio; CI = confidence interval.
Adjusted odds ratios were estimated using multivariable logistic regression including age, baseline serum creatinine, ICU admission, and colistin daily dose.

## **Supplementary Table S4. Sensitivity analysis excluding dialysis patients: multivariable predictors of colistin-induced acute kidney injury**

| Variable | Odds Ratio (95% CI) | *p*-value |
| --- | --- | --- |
| Age (per year) | 1.04 (0.97 – 1.11) | 0.26 |
| Baseline serum creatinine (µmol/L) | 1.00 (0.99 – 1.01) | 0.64 |
| ICU admission | 3.54 (0.95 – 13.13) | 0.06 |
| Colistin daily dose (mg/kg/day) | 0.90 (0.56 – 1.46) | 0.66 |

**Footnotes**:

Multivariable logistic regression excluding dialysis patients (n = 93). Model adjusted for age, baseline serum creatinine, ICU admission, and colistin daily dose.

**Supplementary Table S5. Sensitivity analysis: Multivariable logistic regression model substituting chronic kidney disease for baseline serum creatinine as a covariate**

| Characteristic | Adjusted OR | 95% CI | *p*-value |
| --- | --- | --- | --- |
| Age (per 1-year increase) | 1.04 | 0.99–1.12 | 0.215 |
| Chronic kidney disease | 19.17 | 3.03–121.30 | **0.002** |
| ICU admission | 4.18 | 0.95–18.35 | 0.058 |
| Colistin daily dose (per mg/kg/day increase) | 1.46 | 0.87–2.45 | 0.150 |

**Footnotes**:

Abbreviations: OR, odds ratio; CI, confidence interval; ICU, intensive care unit.

Bold p-value indicates statistical significance (p < 0.05).

The model included 100 patients with complete data for all covariates.
